# Supplementary material for: Lignin oxidation by MnO2 under the irradiation of blue light
Source: Royal Society of Chemistry journal article supplement (doi:10.1039/c8gc03498b), 2019-01-01
Supplement: c8gc03498b1.pdf [file c8gc03498b1.pdf]

## Supporting Information

# Lignin oxidation by MnO<sub>2</sub> under the irradiation of blue light

Jinhuo Dai,<sup>a§</sup> Antonio F. Patti,<sup>a\*</sup> Gavin N. Styles,<sup>a§</sup> Sepa Nanayakkara,<sup>a</sup> Leone Spiccia,<sup>a†</sup> Francesco Arena,<sup>b</sup> Cristina Italiano,<sup>c</sup> Kei Saito<sup>a\*</sup>

9 Pages, 14 Figures, 3 Tables

<sup>a</sup> School of Chemistry, Monash University, Wellington Rd., Clayton, 3800, Victoria, Australia

<sup>b</sup> Dipartimento di Ingegneria Elettronica, Chimica e Ingegneria Industriale, Università degli Studi di Messina, I-98166 Messina, Italy

<sup>c</sup> CNR Institute of Advanced Technology for Energy "Nicola Giordano", Via Salita S. Lucia 5, 98126 Messina, Italy

<sup>§</sup> These authors contributed equally to this research work

Corresponding authors email: email: [tony.patti@monash.edu](mailto:tony.patti@monash.edu), tel: +61(0)399051620, email:

[kei.saito@moansh.edu](mailto:kei.saito@moansh.edu), tel: +61(0)399054600

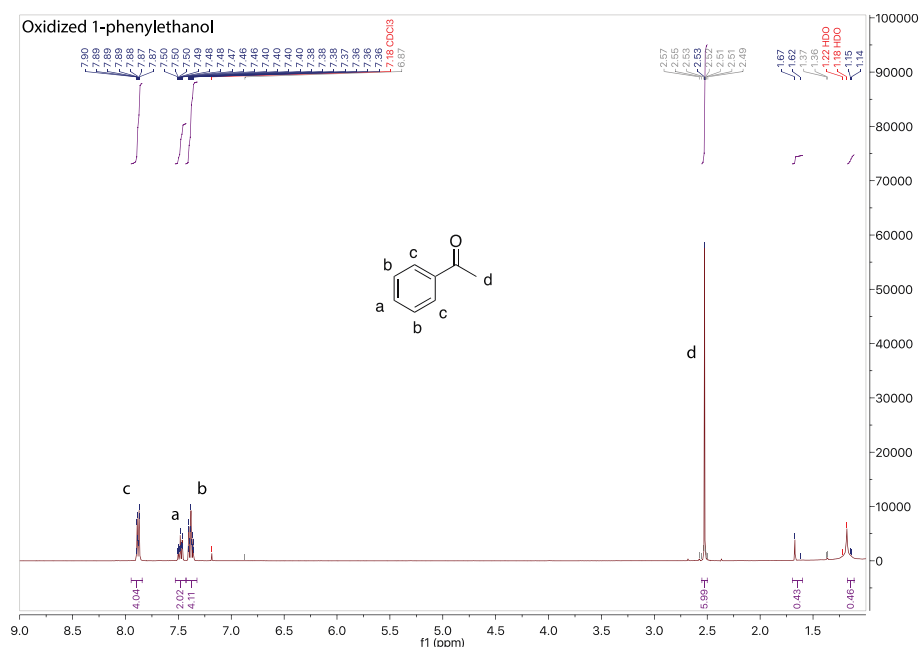

Fig. S1. <sup>1</sup>H-NMR of 1-phenylethanol under the irradiation of blue light with standard condition (Table 2 Entry 4, 98% conversion)

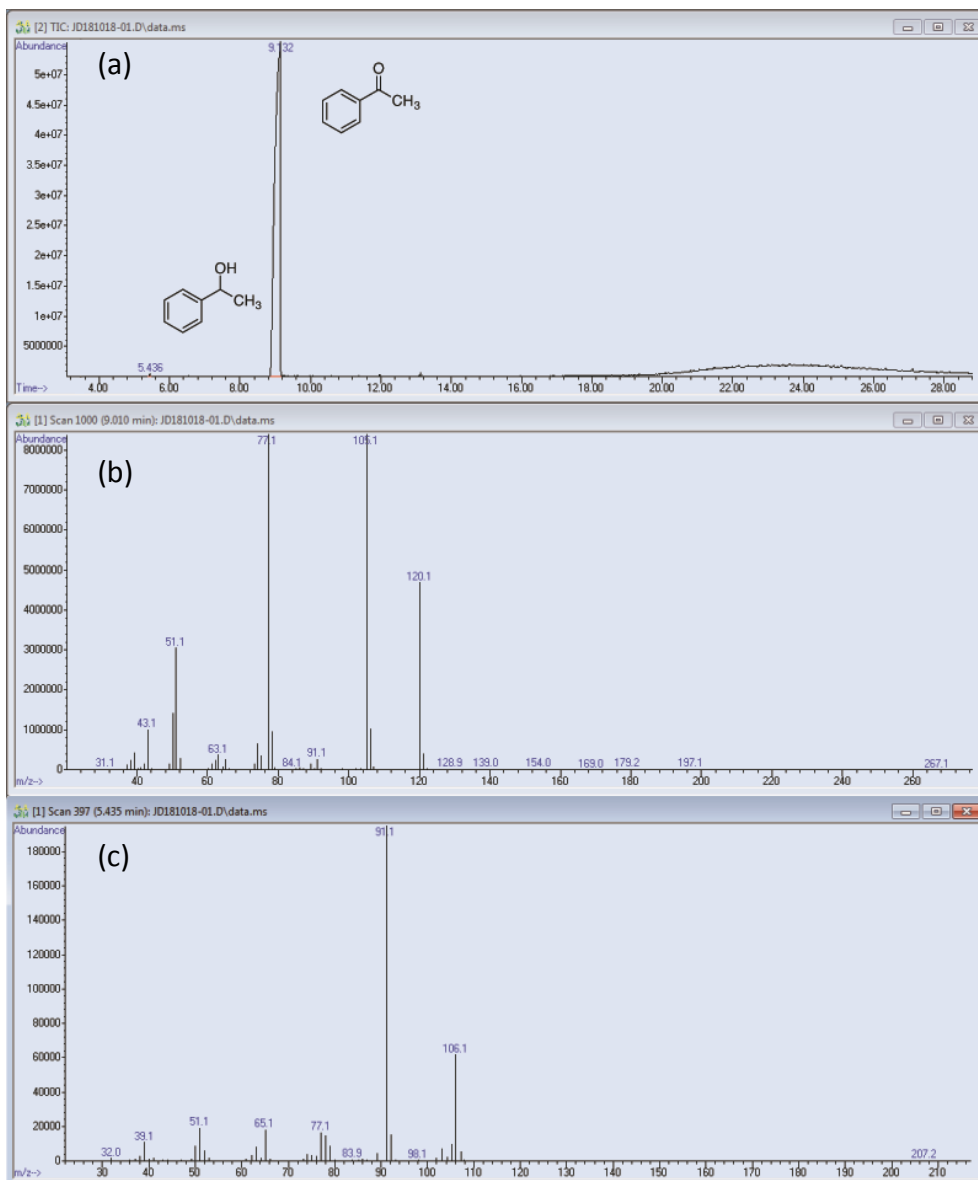

**Fig. S2.** (a): GC chromatogram of oxidation of 1-phenylethanol under the standard condition; (b) Mass spectra of acetophenone with the retention time of 9.131 min (98% conversion); (c) Mass spectra of unreacted 1-phenylethanol with the retention time of 5.439 min

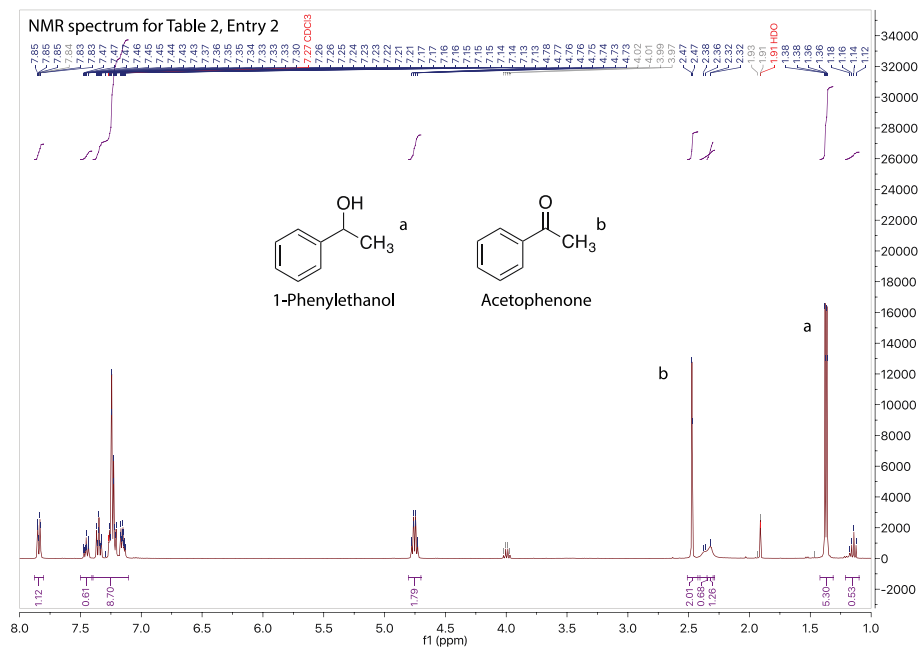

**Fig. S3.**  $^1\text{H}$ -NMR of 1-phenylethanol under the irradiation of UV light (365 nm), with 5 mmol  $\text{MnO}_2$  (Table 2, Entry 2, 26%)

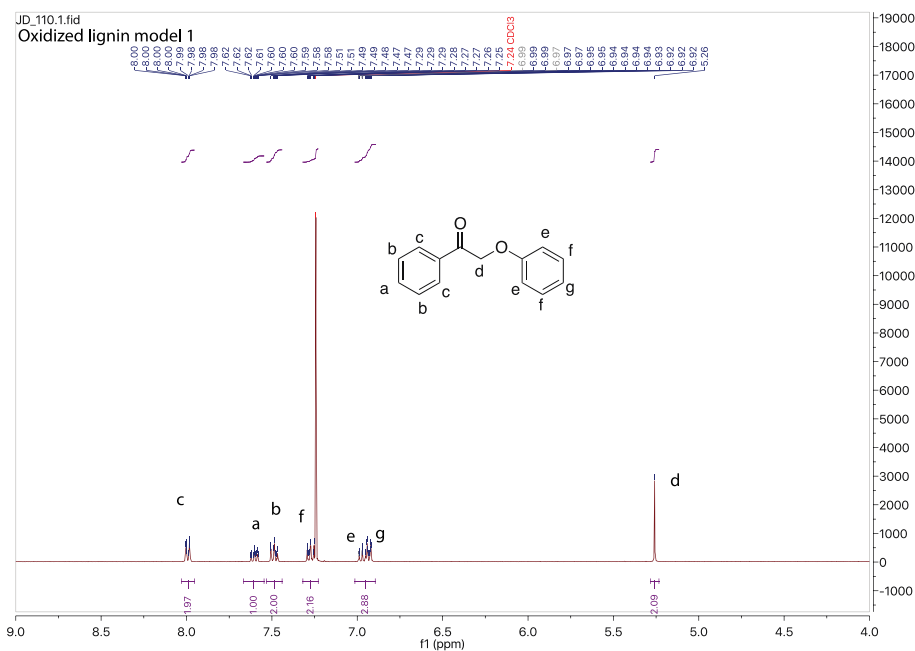

**Fig. S4.**  $^1\text{H}$ -NMR of lignin model 1 under the irradiation of blue light with standard condition (94% conversion)

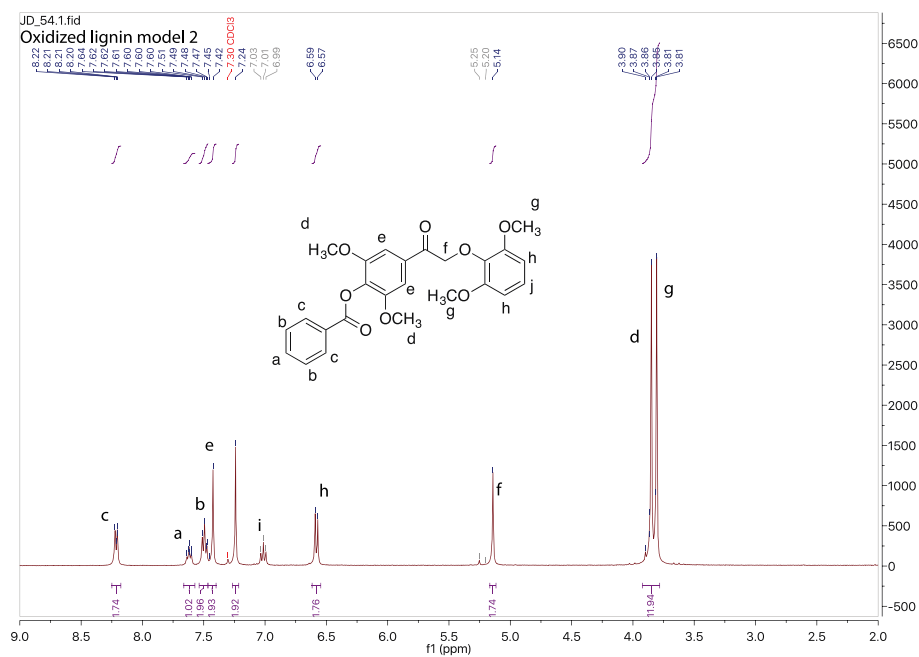

**Fig. S5.**  $^1\text{H-NMR}$  of lignin model 2 under the irradiation of blue light with standard condition (95%)

The conversion of lignin model 2 was based on the ratio of the signal form proton at the position “e” before to after oxidaiton. The signal of this proton shifted after oxidaiton.

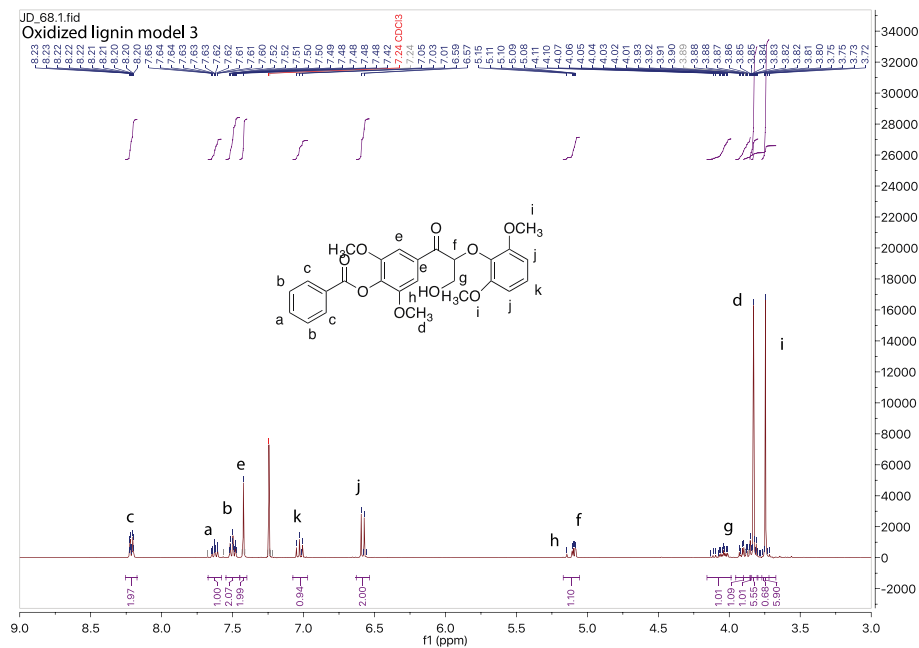

**Fig. S6.**  $^1\text{H-NMR}$  of lignin model 3 under the irradiation of blue light with standard condition (94% conversion)

The conversion of lignin model 3 was based on the ratio of the signal form proton at the position “e” before to after oxidaiton. The signal of this proton shifted after oxidaiton.

**Table S1:** Conversions of all the screening reaction on model compounds.

| Entry | Table 1 | Table 2 | Table 3 | Table 4 | Table 5 |
|-------|---------|---------|---------|---------|---------|
| 1     | 58%     | 97%     | 75%     | 27%     | 76%     |
| 2     | 60%     | 26%     | 29%     | 0%      | 19%     |
| 3     | 75%     | 75%     | 37%     | 73%     | 67%     |
| 4     | 13%     | 98%     | 26%     | 67%     | 10%     |
| 5     | 97%     | 51%     | -       | 97%     | -       |
| 6     | 97%     | 25%     | -       | 0%      | -       |
| 7     | -       | 97%     | -       | 94%     | -       |
| 8     | -       | -       | -       | 95%     | -       |
| 9     | -       | -       | -       | 94%     | -       |

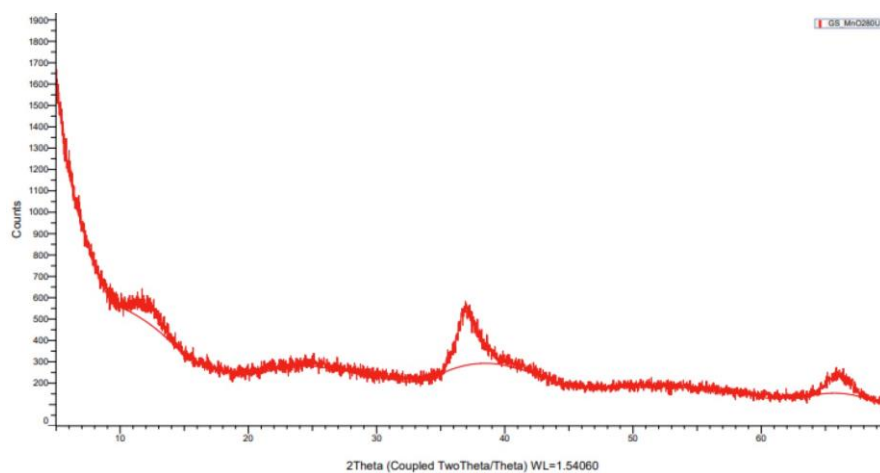

**Fig. S7.** XRD of recycled  $\delta$ -MnO<sub>2</sub> after reactive in the furnace at the temperature of 475°C for 4 hours. The XRD of recycled  $\delta$ -MnO<sub>2</sub> showed it's still  $\delta$ -MnO<sub>2</sub>.

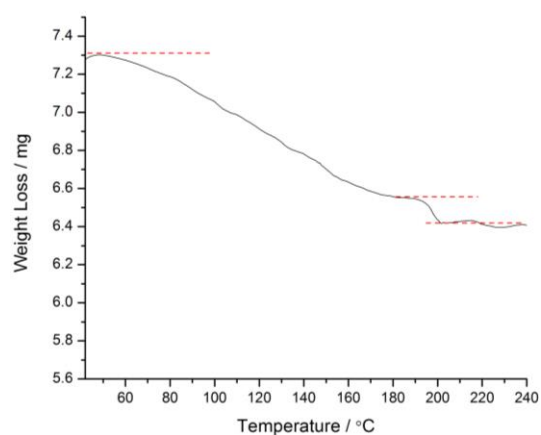

**Fig. S8.** TGA spectrum of recovered  $\delta$ -MnO<sub>2</sub>.

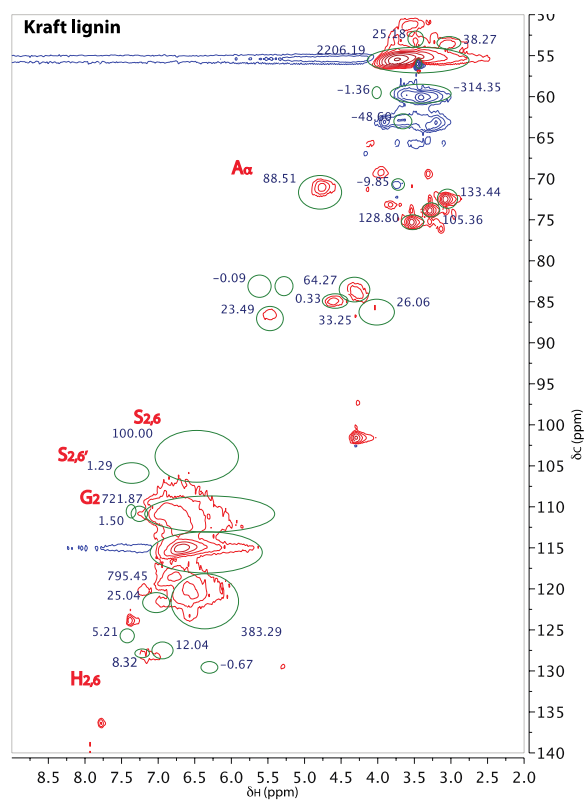

Fig. S9. HSQC-NMR of native kraft lignin

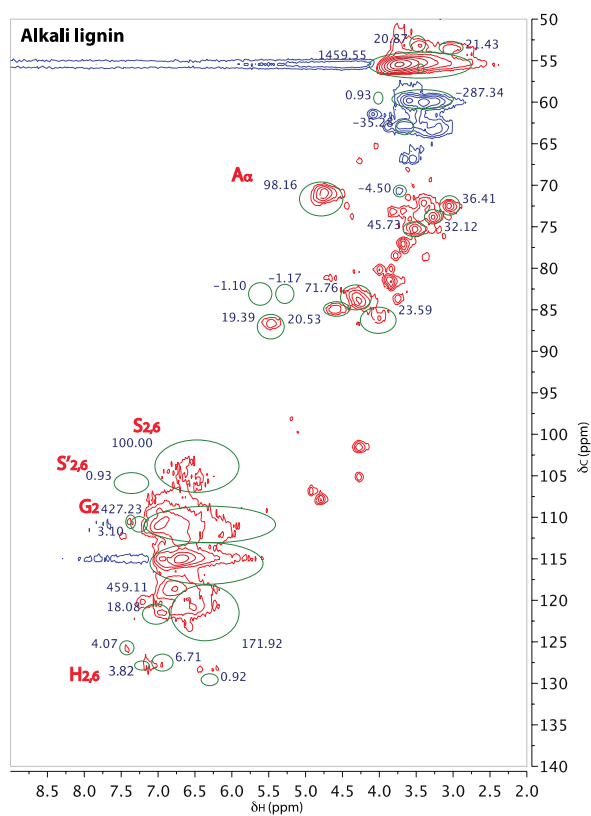

Fig. S10. HSQC-NMR of native alkali lignin

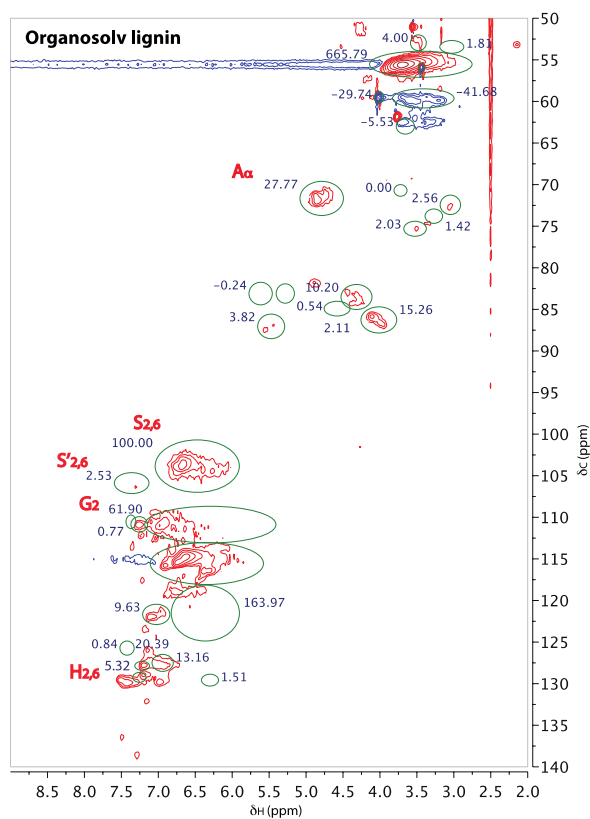

**Fig. S11.** HSQC-NMR of native organosolv lignin

**Table S2** Integrations of three native lignin structure

|                                             | Kraft lignin | Alkali lignin | Organosolv lignin |
|---------------------------------------------|--------------|---------------|-------------------|
| G2                                          | 721.87       | 427.73        | 61.90             |
| G'2                                         | 0            | 0             | 0                 |
| G'6                                         | 0            | 0             | 0                 |
| S2,6                                        | 0            | 17.43         | 100               |
| S'2,6                                       | 1.29         | 0.93          | 2.53              |
| H2,6                                        | 8.32         | 3.82          | 5.32              |
| $G_{total}=G2+G'2+G'6-H2,6$                 | 713.55       | 423.91        | 56.58             |
| $S_{total}=(S2,6+S'2,6)/2$                  | 0.645        | 9.18          | 51.265            |
| $H_{total}=H2,6$                            | 8.32         | 3.82          | 5.32              |
| Total= $G_{total}+ S_{total}+ H_{total}$    | 722.515      | 436.91        | 113.165           |
| Aα                                          | 88.51        | 98.16         | 27.77             |
| Percentage of β-O-4 linkage= Aα/Total x 100 | 12.25%       | 23.16%        | 24.54%            |

**Table S3** Analysis of three native lignin structure

|                   | Kraft lignin          | Alkali lignin          | Organosolv lignin          |
|-------------------|-----------------------|------------------------|----------------------------|
| S/G/H units ratio | 0.1% / 99.3% / 0.6%   | 2% / 97% / 1%          | 44%/53%/3%                 |
| β-O-4*            | 12.25%                | 23.16%                 | 24.54%                     |
|                   | Oxidized Kraft lignin | Oxidized Alkali lignin | Oxidized Organosolv lignin |
| β-O-4*            | 1%                    | 3%                     | 2%                         |

\* per aromatic circle

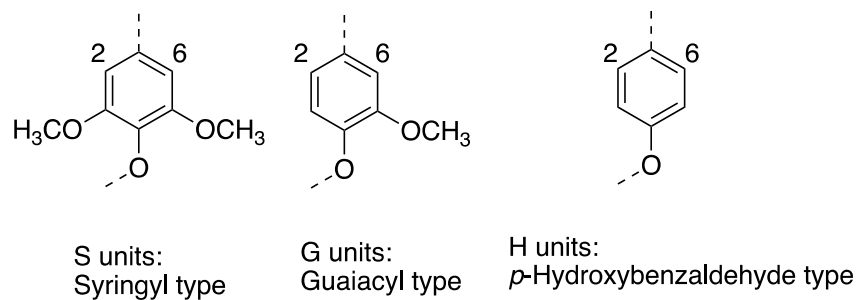

Fig. S12. Structure of three basic units in lignin

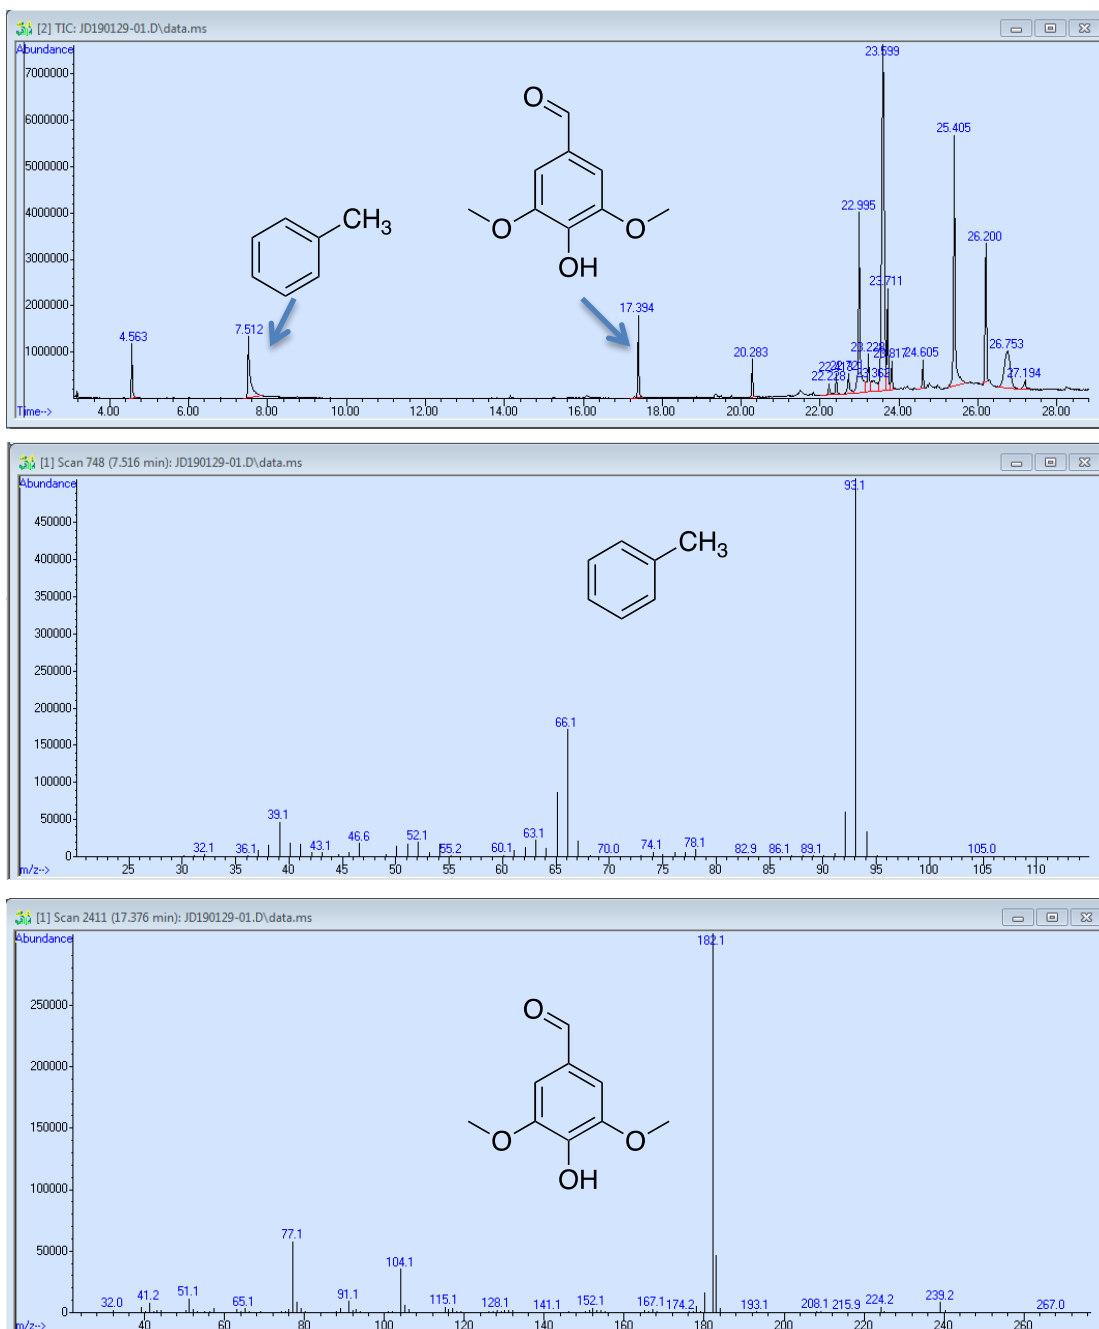

Fig. S13. GC-MS spectrum of ethyl acetate soluble fraction from depolymerised organosolv lignin



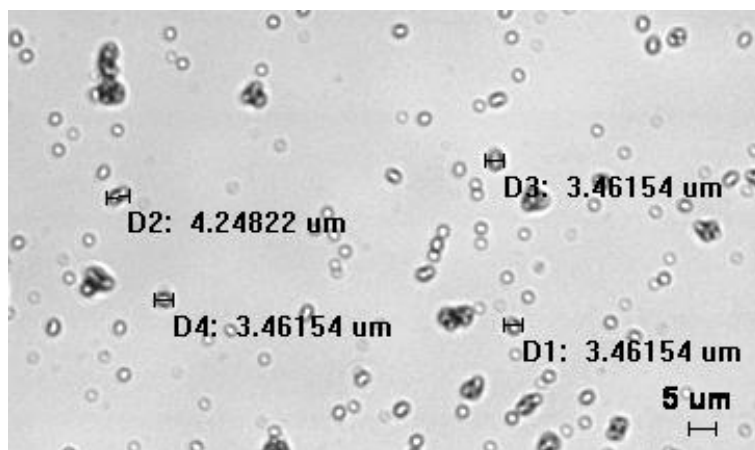

**Fig. S14.** Optical microscope image of MnO<sub>2</sub>
